# Supplementary material
Source: HighWire-hosted journal article supplement (doi:10.1101/rna.060632.117)
Supplement: Supplemental_Legend.docx [file Supplemental_Legend.docx]

**SUPPLEMENTARY MATERIAL**

Two tables containing SAXS-based molecular weight determinations and fitting analyses of monomer, dimer and monomer/dimer mixture atomic models, as well as six figures containing RNA sequences, electrophoretic and chromatographic data, Kratky plots, and additional SAXS analyses of subdomain SL2’ and the full-length 3’X domain have been provided as Supplementary Material.
